# Supplementary material
Source: PubMed Central journal article supplement (PMC4018862)
Supplement: AEM.04248-13_zam999105385so1.pdf [file AEM.04248-13_zam999105385so1.pdf]

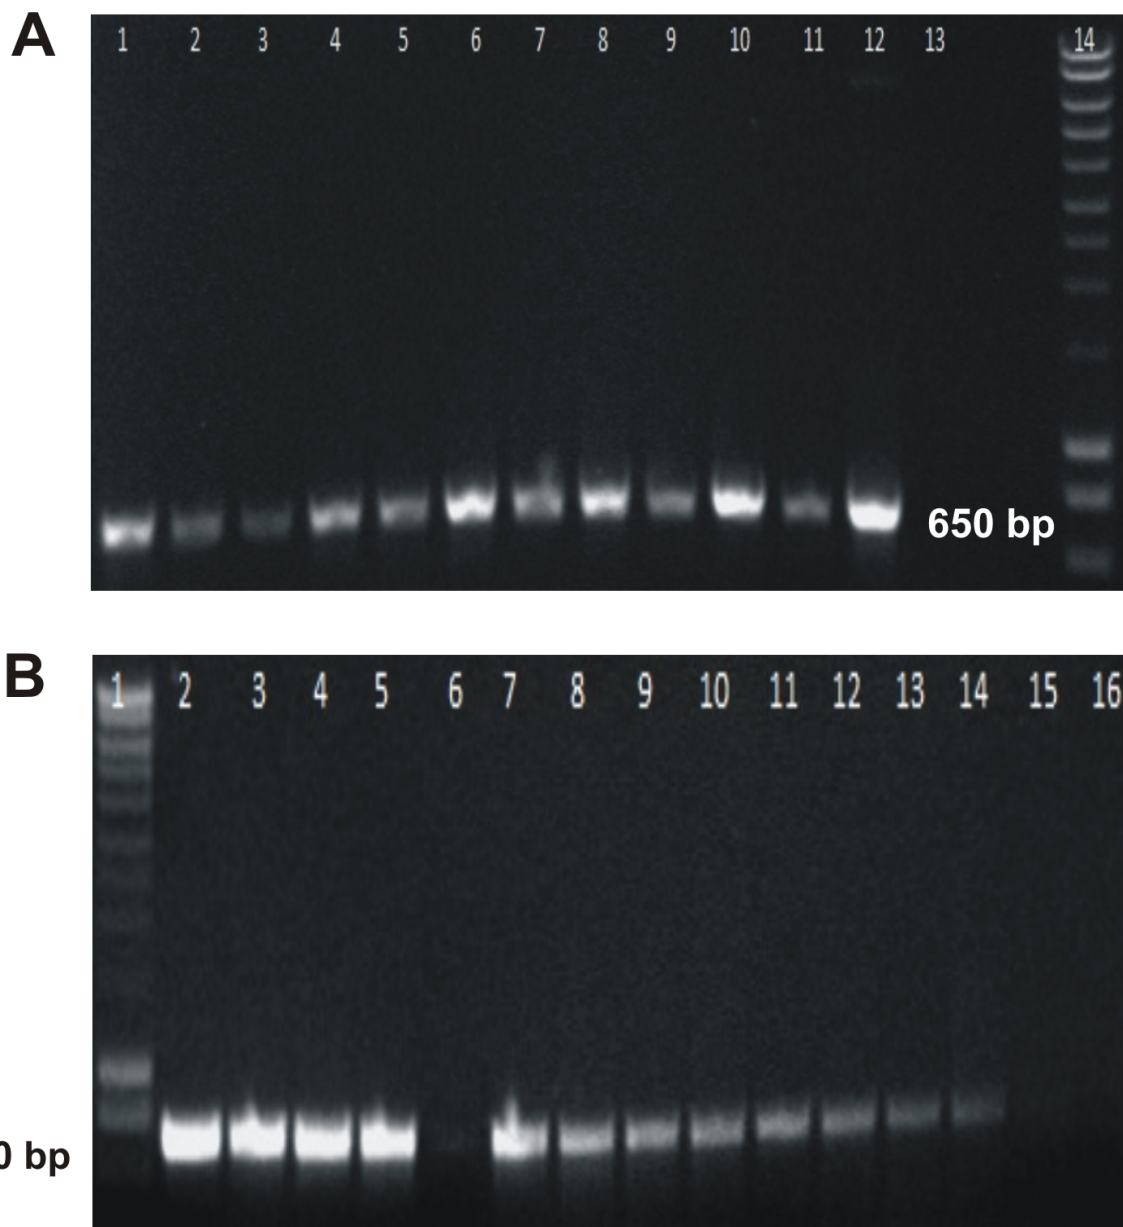

**FIG S1** (A) PCR amplification of the *bla* gene (650 bp) of pMU125 from OMVs isolated from stressed and non-stressed cultures; lane 1, OMVs from untreated cells; lane 2, OMVs from temperature increase treatment; lane 3, OMVs from desiccation stress; lanes 4-5, OMVs from treatment with gentamicin (lane 4:  $0.1 \mu\text{g ml}^{-1}$ ; lane 5:  $0.3 \mu\text{g ml}^{-1}$ ); lanes 6-7, OMVs from treatment with chloramphenicol (lane 6:  $0.1 \mu\text{g ml}^{-1}$ ; lane 7:  $1 \mu\text{g ml}^{-1}$ ); lane 8, OMVs from untreated cells grown in minimal medium; lane 9, OMVs from nutrient-deprived cells; lanes 10-11, OMVs from UV light exposure (lane 10: 5 minutes; lane 11: 20 minutes); lane 12, *A. baylyi* JV26 (pMU125) cells; lane 13, negative control; lane 14, smart ladder (200 to 10,000 bp, Eurogentec). (B) PCR amplification of the *bla* gene: Lane 1, smart ladder (200 to 10,000 bp, Eurogentec); lanes 2-5, DNA from *E. coli* DH5 $\alpha$  vesiculants; lanes 6-14, DNA from *A. baylyi* JV26 vesiculants; lane 16, negative control.

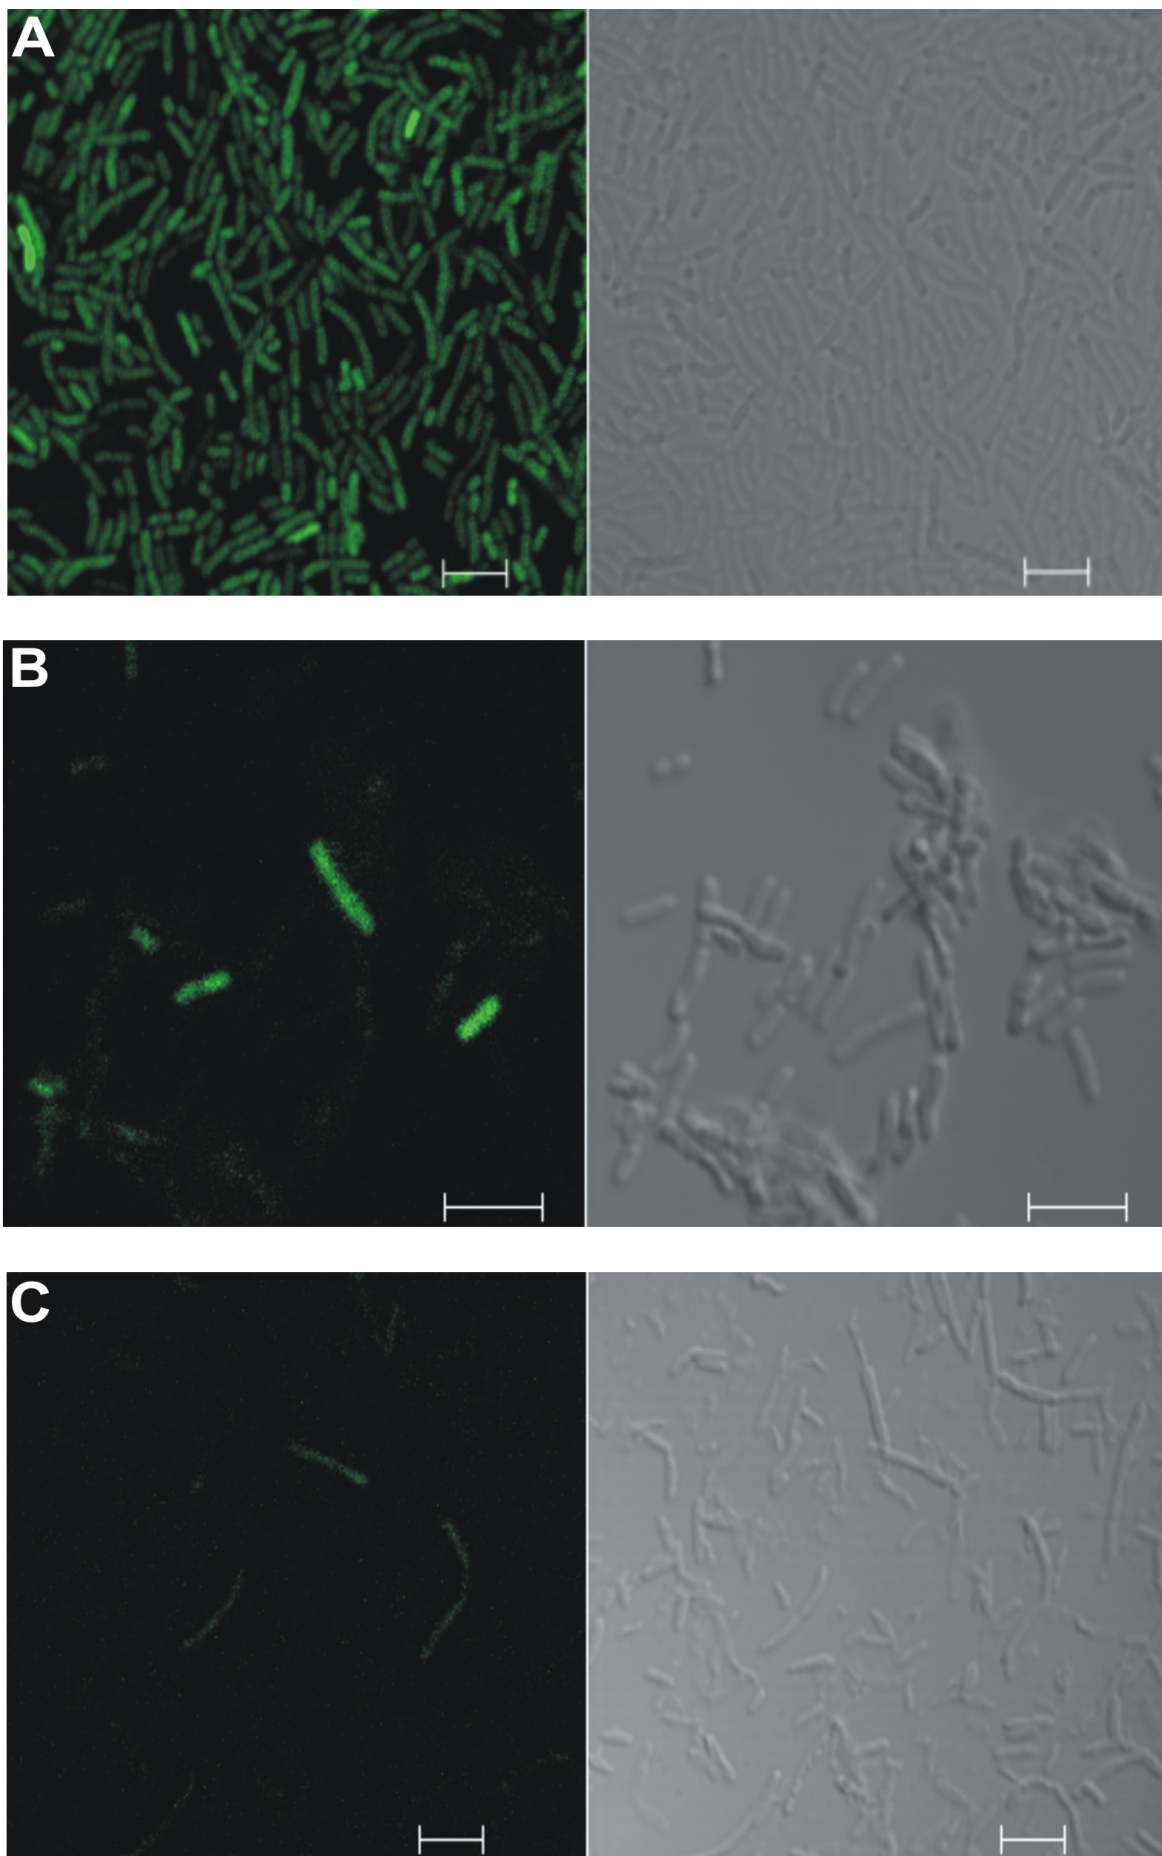

**FIG S2** (A) Confocal microscopy of *A. baylyi* (pMU125) with GFP expression (donor strain of OMVs and positive control). (B) Confocal microscopy of vesiculants of *A. baylyi* cells with GFP expression after acquiring pMU125 through OMVs. (C) Confocal microscopy of vesiculants of *E. coli* DH5α cells after acquiring pMU125 through OMVs. Bars 5 μm.



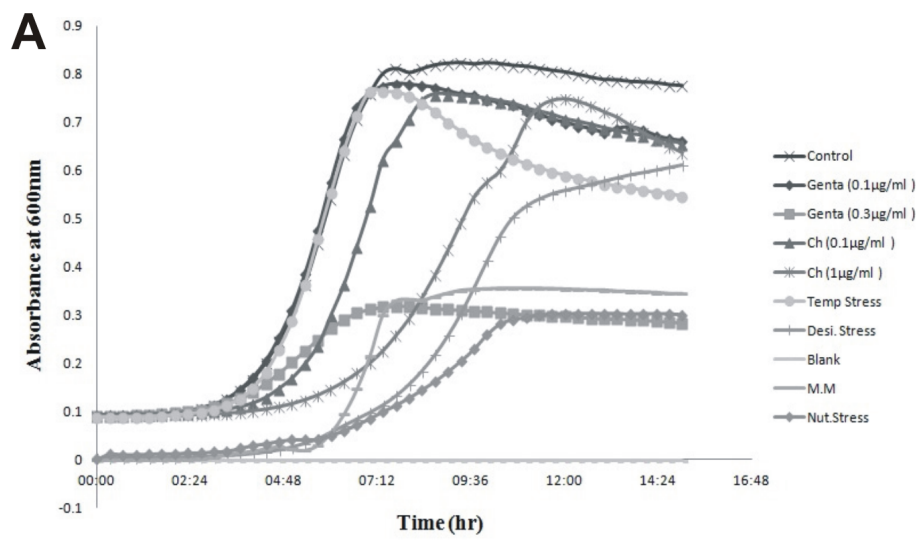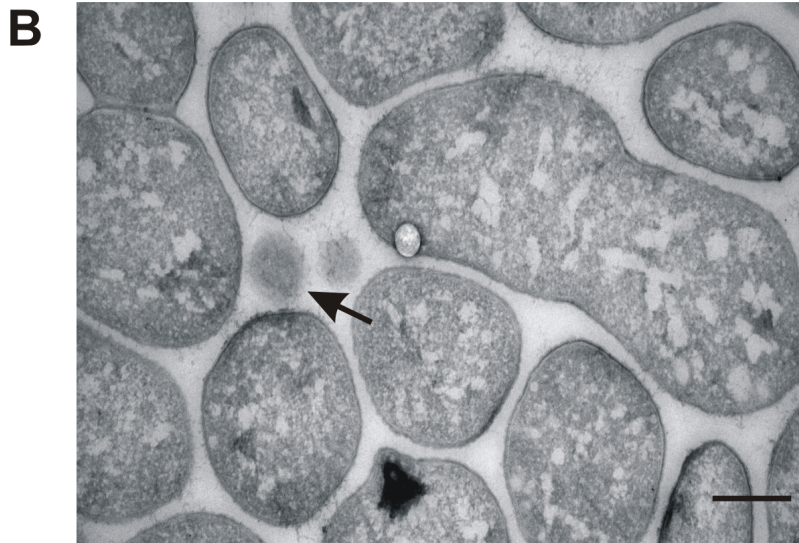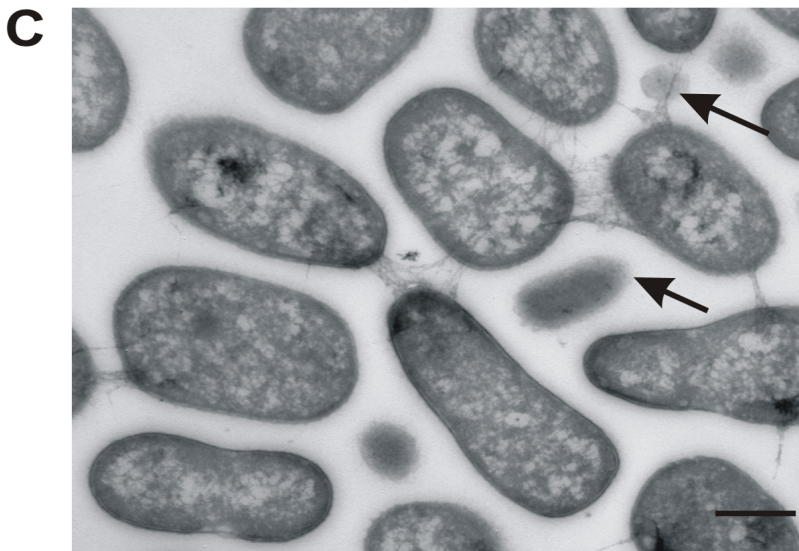

**FIG S3** (A) Effect of stress on the growth of *A. baylyi* JV26 (pMU125) cells. Cells grown in LB medium as control (—×—), with  $0.1 \mu\text{g ml}^{-1}$  gentamicin (—◆—), with  $0.3 \mu\text{g ml}^{-1}$  gentamicin (—■—) with  $0.1 \mu\text{g ml}^{-1}$  chloramphenicol (—▲—), with  $1 \mu\text{g ml}^{-1}$  chloramphenicol (—\*—), with temperature stress ( $37^\circ\text{C}$ ) (—●—), with  $0.5 \text{ M NaCl}$  (—+—), cells grown in M9 minimal medium as control (—), with nutrient stress (—◆—) and blank (no cells) (—). (B) TEM micrograph of *A. baylyi* cells grown with temperature stress ( $37^\circ\text{C}$ ) (C) TEM micrograph of *A. baylyi* cells grown with desiccation stress ( $0.5 \text{ M NaCl}$ ). Arrows indicate released OMVs. Bars  $1 \mu\text{m}$ .
